# Supplementary material
Source: PubMed Central journal article supplement (PMC4044717)

# Supplemental Figure 1

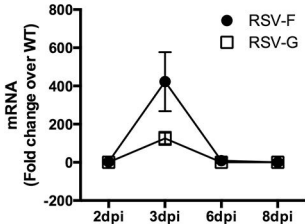

Supplement: mmc1.pdf [file mmc1.pdf]

## Supplemental Figure 2

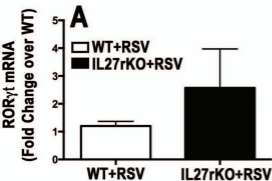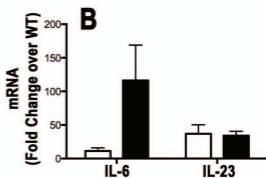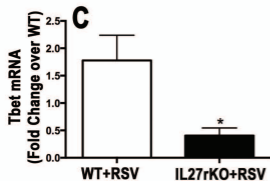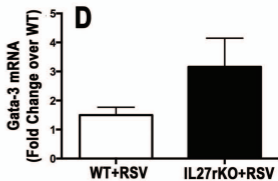

Supplement: mmc2.pdf [file mmc2.pdf]

# Supplemental Figure 3

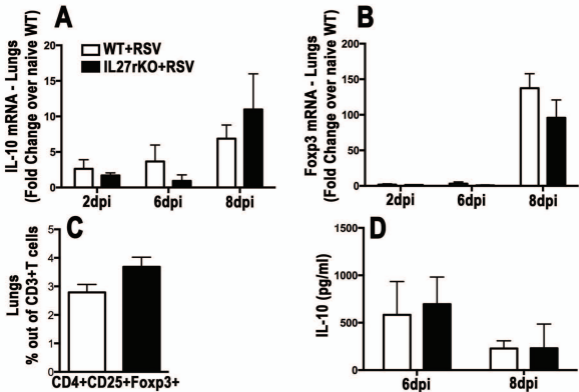

Supplement: mmc3.pdf [file mmc3.pdf]
